# Supplementary material for: Elucidating metal and ligand redox activities of a copper-benzoquinoid coordination polymer as the cathode for lithium-ion batteries
Source: Royal Society of Chemistry journal article supplement (doi:10.1039/c9ta05244e), 2019-01-01
Supplement: c9ta05244e1.pdf [file c9ta05244e1.pdf]

## Electronic Supplementary Information

### Elucidating Metal and Ligand Redox Activities of Copper-Benzoquinoid Coordination Polymer as Cathode for Lithium-Ion Batteries

Cheng-Han Chang,<sup>a,‡</sup> An-Che Li,<sup>bc,‡</sup> Ilja Popovs,<sup>d</sup> Watchareeya Kaveevivitchai,<sup>bc</sup>  
Jeng-Lung Chen,<sup>e</sup> Kai-Chun Chou,<sup>a</sup> Ting-Shen Kuo,<sup>f</sup> and Teng-Hao Chen<sup>\*g</sup>

<sup>a</sup> Department of Chemistry, Tamkang University, New Taipei City 25137, Taiwan

<sup>b</sup> Department of Chemical Engineering, National Cheng Kung University, Tainan City 70101, Taiwan

<sup>c</sup> Hierarchical Green-Energy Materials Research Center, National Cheng Kung University, Tainan City 70101, Taiwan

<sup>d</sup> Chemical Sciences Division, Oak Ridge National Laboratory, Oak Ridge, P.O. Box 2008, TN 37831, USA

<sup>e</sup> National Synchrotron Radiation Research Center, Hsinchu 30076, Taiwan

<sup>f</sup> Department of Chemistry, National Taiwan Normal University, Taipei 11677, Taiwan

<sup>g</sup> School of Pharmacy, National Cheng Kung University, Tainan City 70101, Taiwan

<sup>‡</sup>These authors contributed equally to this work.

<sup>\*</sup>To whom correspondence should be addressed. E-mail: thchen@gs.ncku.edu.tw

## General methods and materials

Starting materials and solvents were purchased and used without further purification from commercial suppliers (Sigma-Aldrich and TCI).  $^1\text{H}$  and  $^{13}\text{C}$  nuclear magnetic resonance (NMR) spectra were recorded on a Bruker AV300 or AV600 spectrometer. Chemical shifts are quoted in parts per million (ppm) referenced to the appropriate solvent peak. Fourier-transform infrared (FT-IR) spectra were recorded on Nicolet iS5 or Nicolet 6700, Thermo Scientific. Powder X-ray diffraction (PXRD) patterns were collected on Bruker D8 Advance. Single-crystal X-ray diffraction experiments were performed by using Bruker D8 Venture dual X-ray single crystal diffractometer. Thermogravimetric analyses (TGA) were carried out on a TA Instrument TGA 2050 from 25 to 900 °C with a ramping rate 20 °C min<sup>-1</sup> under the flow of N<sub>2</sub>. Mass spectrometry measurements were recorded on Bruker Autoflex III TOF/TOF system MALDI MASS. Cyclic voltammetry (CV) experiments were performed in solution using a CH Instruments Electrochemical Analyzer. All measurements were carried out at room temperature with a conventional three-electrode configuration consisting of a carbon working electrode, a platinum wire auxiliary electrode, and a Ag/AgCl reference electrode. X-ray absorption spectroscopy experiments were performed at beamline TPS44A at National Synchrotron Radiation Research Center, Hsinchu, Taiwan. X-ray photoelectron spectroscopy (XPS) measurements were done using ULVAC PHI 5000 VersaProbe III equipped with an Al K $\alpha$  (1487 eV) as a radiation source. Survey scans were collected with a pass energy of 100 eV, followed by a high-resolution scans of the C 1s and Cu 2p regions with a pass energy of 20 eV. All spectra were charge-corrected relative to the C 1s component at 284.7 eV binding energy, and analyzed using CasaXPS software. High-resolution transmission electron microscopy (HR-TEM) was carried out on JEM-2010 Electron Microscope, JEOL. Elemental analysis was performed on Elementar Vario EL III.

## Electrochemical characterization

Coordination polymer (CP) crystals were mixed and ground with carbon black (CB, Super P), graphite (TIMREX<sup>®</sup> KS4), and poly(vinylidenedifluoride) (PVDF) in *N*-methyl-2-pyrrolidinone (NMP) in a 3:5:1:1 weight ratio. The slurry was coated onto carbon paper (EP40) current collector. The electrodes were dried overnight at 100 °C in vacuum. LH<sub>4</sub> electrodes were prepared with the same additives as a comparison with CP electrodes. CR2032 coin cells were assembled by using Li metal anode, 1 M LiPF<sub>6</sub> in 1:1 v/v ethylene carbonate (EC)/ dimethyl carbonate (DMC) electrolyte solution, and Celgard separator. The electrochemical testing was carried out with an Arbin cycler and a VMP3 system (BioLogic) at various current densities. Galvanostatic intermittent

titration technique (GITT) was performed by alternating 20 mA g<sup>-1</sup> pulses (30 min) with relaxation periods (90 min).

### Synthesis of 2, 3, 5, 6-tetra-*tert*-butoxyterephthalonitrile

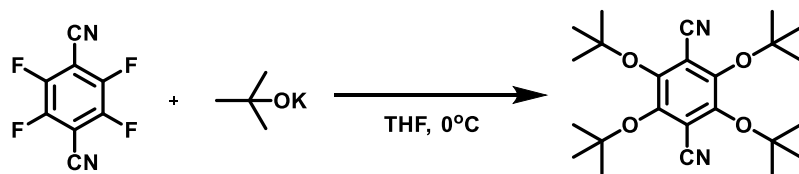

Solid potassium *tert*-butoxide (30.3 g, 270 mmol) was placed in a 1000 mL round bottom flask equipped with a magnetic stir bar, and 270 mL of anhydrous tetrahydrofuran (THF) was added via cannula under nitrogen atmosphere. After stirring for 20 min, the resulting solution was cooled to 0 °C using ice bath, and the solution of tetrafluorobenzodinitrile (12.0 g, 60 mmol) in 30 mL of anhydrous THF was slowly added via syringe (CAUTION: EXOTHERMIC REACTION !!!), upon addition the color of the reaction mixture changes from colorless to dark yellow. After complete addition of dinitrile, the reaction mixture was allowed to warm up to room temperature, and allowed to stir for 1 h. The reaction mixture was cooled back with an ice bath, and 600 mL of deionized water was added to the vigorously stirred reaction mixture, causing the intermediate product to precipitate. The precipitate was filtered off, and washed with the additional amount of 3×300 mL of deionized water/methanol mixture 1:1 v/v. The resulting white solid was air- and vacuum-dried overnight and used in the next step without further purification. Yield: 90%. <sup>1</sup>H NMR (600MHz, CDCl<sub>3</sub>): δ 1.43 (CH<sub>3</sub>). <sup>13</sup>C NMR (600MHz, CDCl<sub>3</sub>) δ 29.15, δ 87.34, δ 115.65, δ 115.70, δ 149.73. FT-IR: 2977 (s,  $\tilde{\nu}_{C-H}$ ), 2231 (s,  $\tilde{\nu}_{C\equiv N}$ ), 1262 (s,  $\tilde{\nu}_{C-O}$ ). MALDI-TOF (m/z) [M+H]<sup>+</sup> calculated for C<sub>24</sub>H<sub>36</sub>N<sub>2</sub>O<sub>4</sub>, 416.27, found 417.31.

### Synthesis of 1,4-dicyano-2,3,5,6-tetrahydroxybenzene (LH<sub>4</sub>)

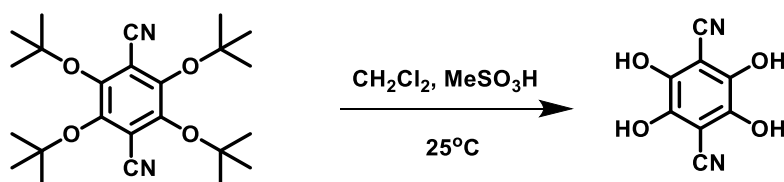

2, 3, 5, 6-tetra-*tert*-butoxyterephthalonitrile (13.8 g, 33.1 mmol) was dissolved in 120 mL of dichloromethane (DCM). To this solution, 6 mL of methane sulfonic acid (MeSO<sub>3</sub>H) was slowly added, causing the precipitation of the product. The reaction mixture was vigorously stirred for 12 h at 25 °C, after which the product was filtered off and washed with the additional amount of DCM 3×100 mL, air-dried and finally dried under high vacuum to afford product. Yield: 75%. <sup>1</sup>H NMR (600MHz, *d*<sub>6</sub>-DMSO): δ 9.88 (OH). <sup>13</sup>C NMR (600MHz, *d*<sub>6</sub>-DMSO) δ 97.77, δ 114.06, δ 141.07. FT-IR:

3419 (s,  $\tilde{\nu}_{\text{O-H}}$ ), 2245 (s,  $\tilde{\nu}_{\text{C}\equiv\text{N}}$ ). MALDI-TOF ( $m/z$ )  $[\text{M}+\text{H}]^+$  calculated for  $\text{C}_8\text{H}_4\text{N}_2\text{O}_4$ , 192.13, found 192.95.

### Synthesis of coordination polymer $[\text{CuL}(\text{DMF})_2]_n$

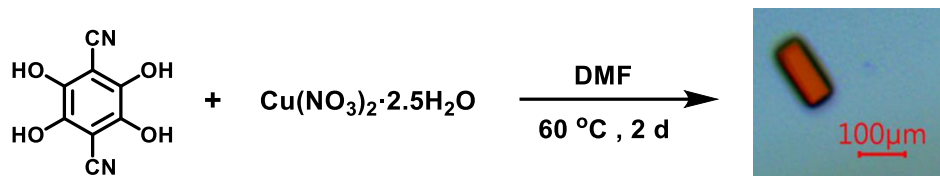

$\text{LH}_4$  (20 mg, 0.1 mmol) and  $\text{Cu}(\text{NO}_3)_2 \cdot 3\text{H}_2\text{O}$  (20 mg, 0.1 mmol) were dissolved in 30 mL of *N,N*-dimethylformamide (DMF). The solution was transferred into a 4 mL vial and heated at  $60\text{ }^\circ\text{C}$  for 48 h. The reaction product was cooled to room temperature and afforded orange single crystals. The product was washed with DMF ( $3 \times 5\text{ mL}$ ) and ethyl acetate ( $3 \times 5\text{ mL}$ ) and dried in vacuum at  $70\text{ }^\circ\text{C}$  for 8 h. Yield calculated from the evacuated sample was 68 % based on Cu. FT-IR: 2215 (s,  $\tilde{\nu}_{\text{C}\equiv\text{N}}$ ), 1655 (s,  $\tilde{\nu}_{\text{C}=\text{O}}$ ). Anal. calcd (%) for  $\text{CuC}_{14}\text{H}_{14}\text{N}_4\text{O}_6$ : C 42.25, H 3.55, N 14.08; Found: C 41.21, H 2.88, N 13.70.

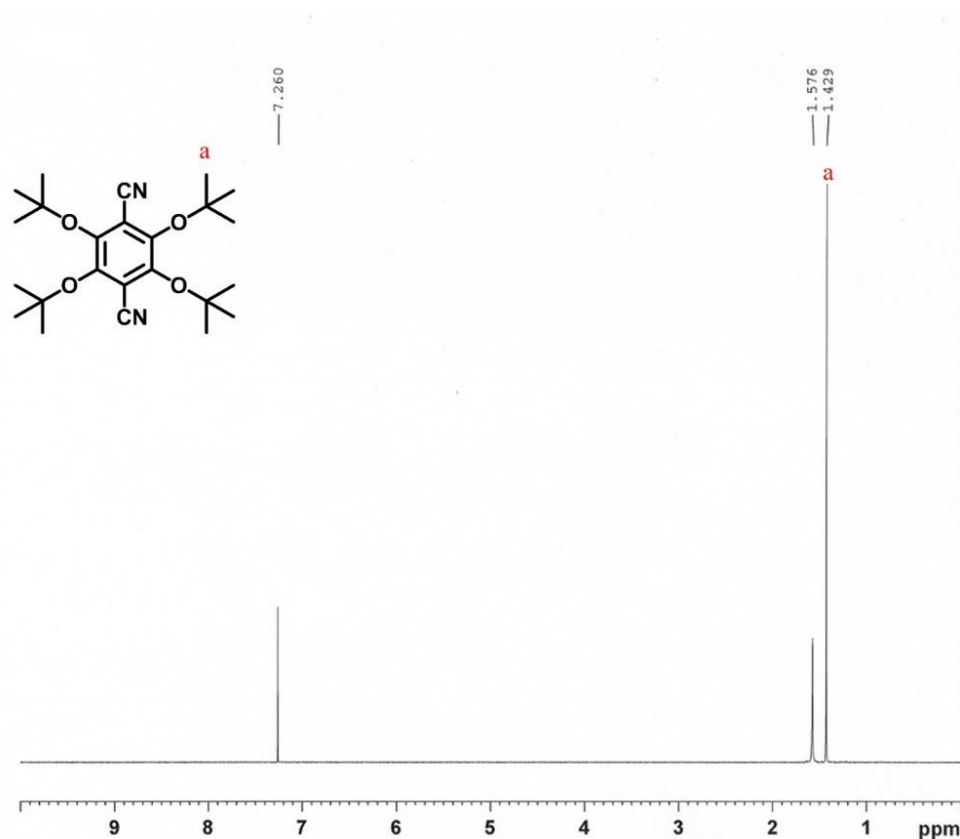

**Fig. S1**  $^1\text{H}$  NMR spectrum of 2, 3, 5, 6-tetra-*tert*-butoxyterephthalonitrile.

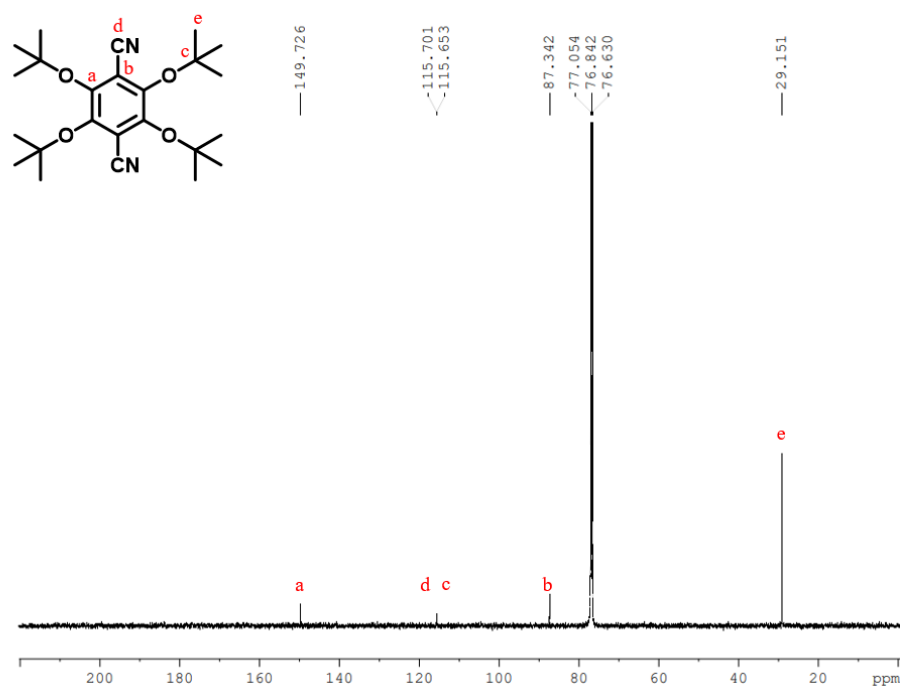

**Fig. S2**  $^{13}\text{C}$  NMR spectrum of 2,3,5,6-tetra-*tert*-butoxyterephthalonitrile.

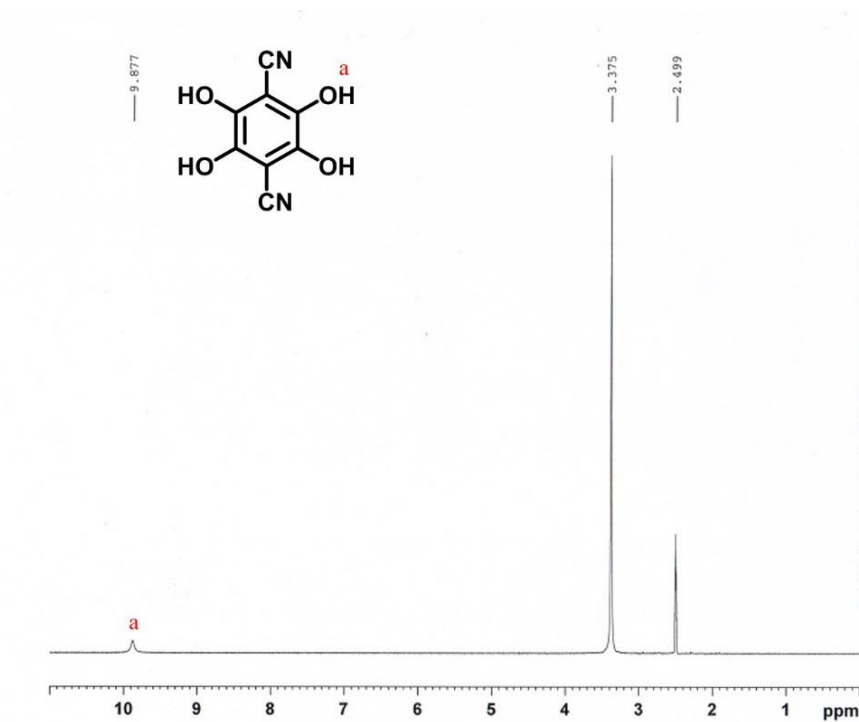

**Fig. S3**  $^1\text{H}$  NMR spectrum of LH4.

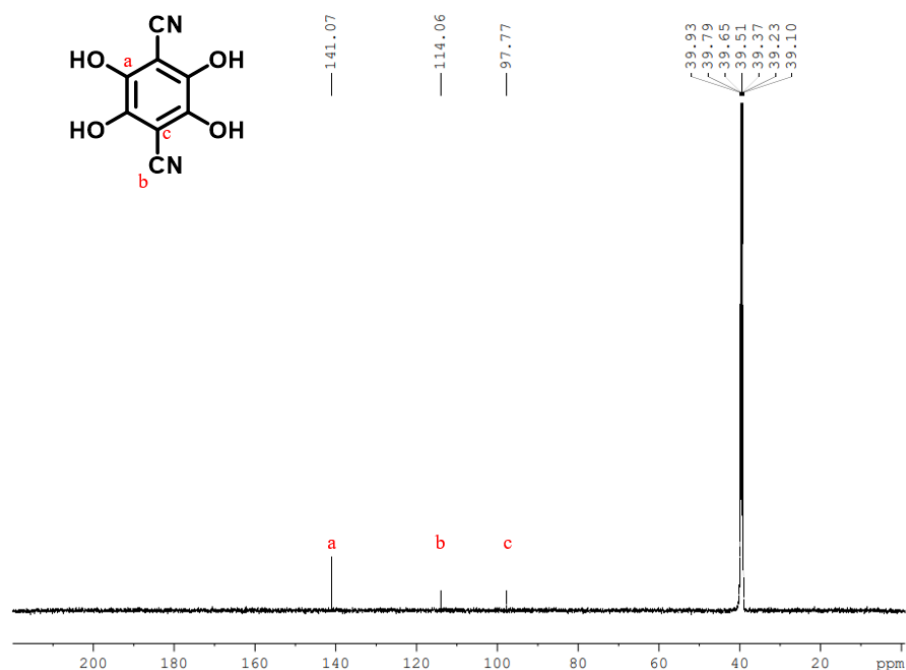

**Fig. S4**  $^{13}\text{C}$  NMR spectrum of LH4.

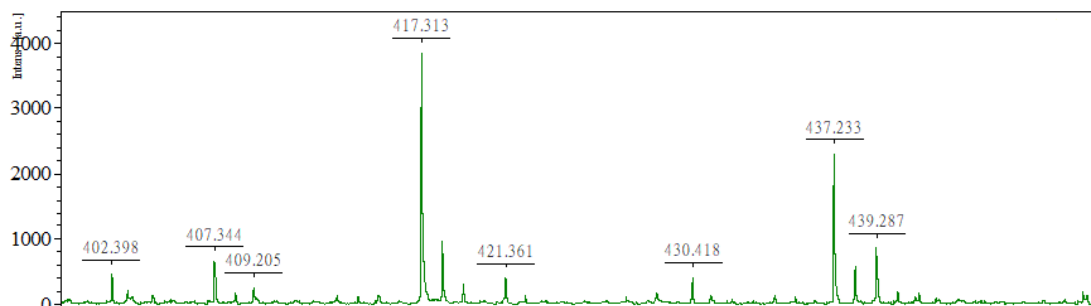

**Fig. S5** Mass spectrum of 2, 3, 5, 6-tetra-*tert*-butoxyterephthalonitrile.

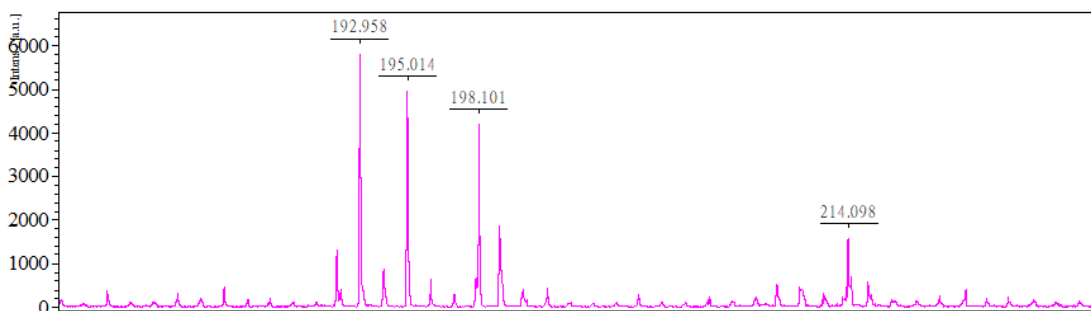

**Fig. S6** Mass spectrum of LH4.

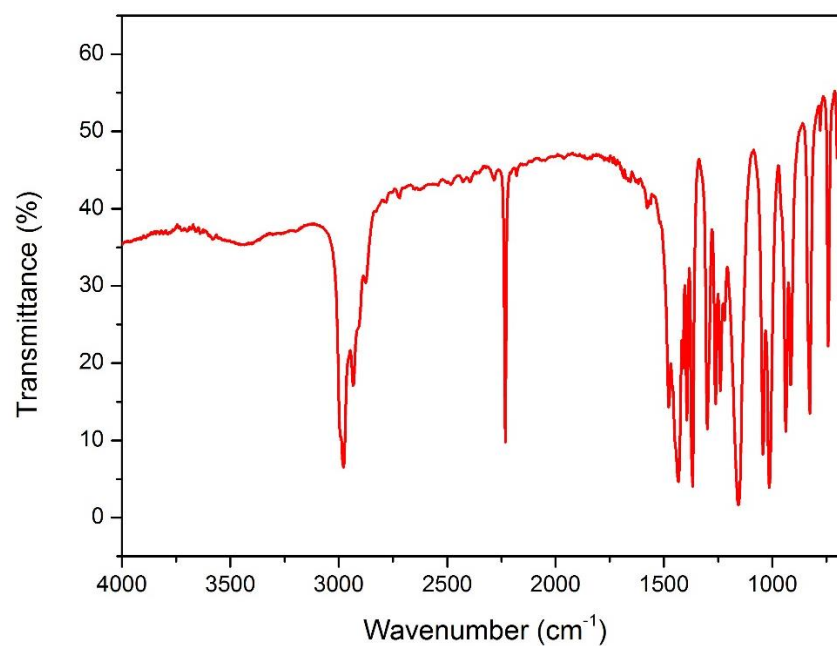

**Fig. S7** FT-IR spectrum of 2, 3, 5, 6-tetra-*tert*-butoxyterephthalonitrile.

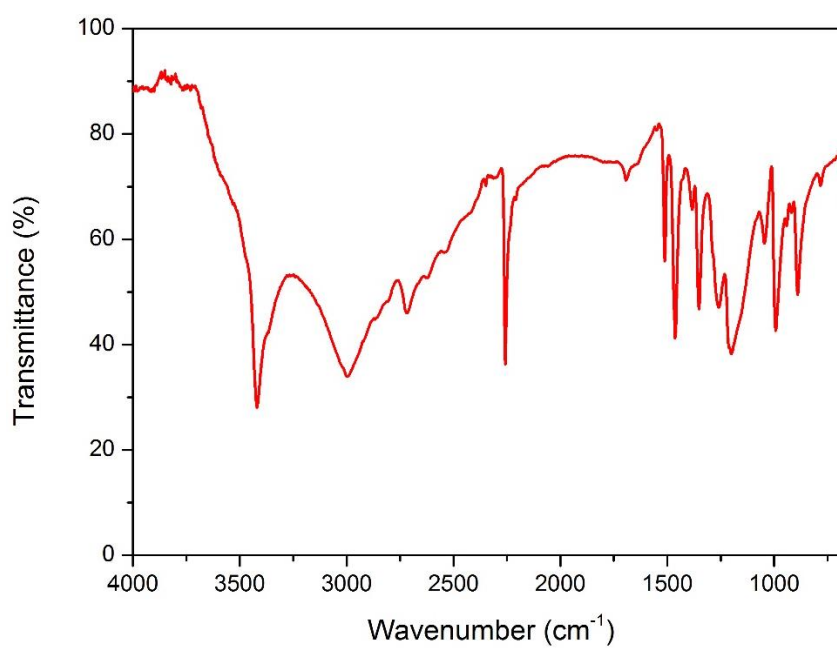

**Fig. S8** FT-IR spectrum of LH<sub>4</sub>.

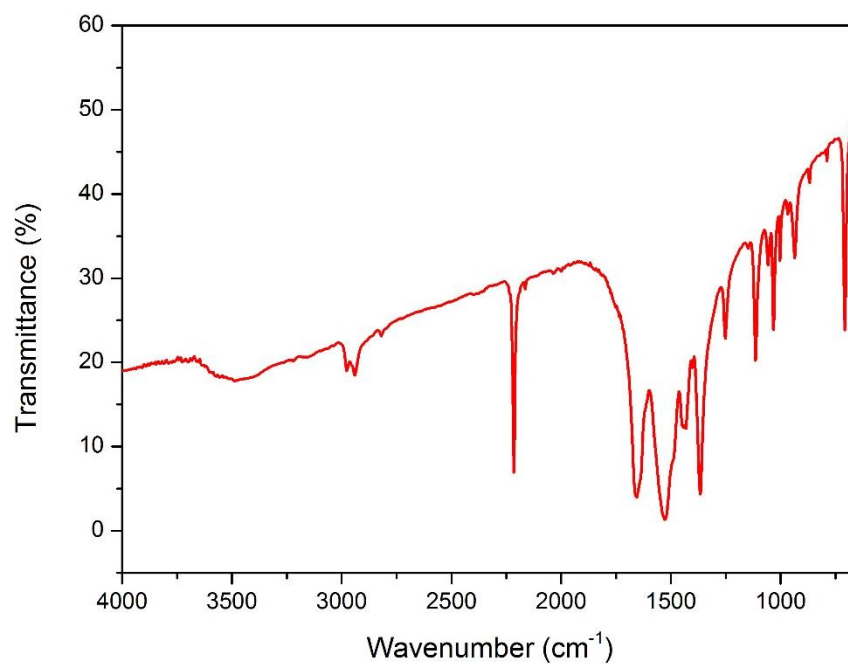

**Fig. S9** FT-IR spectrum of  $[\text{CuL}(\text{DMF})_2]_n$ .

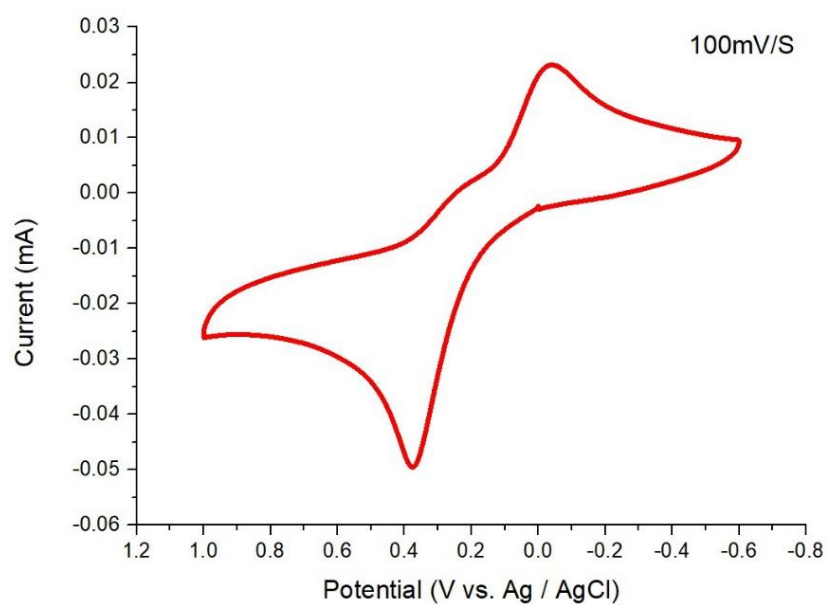

**Fig. S10** CV plot of  $\text{LH}_4$ .



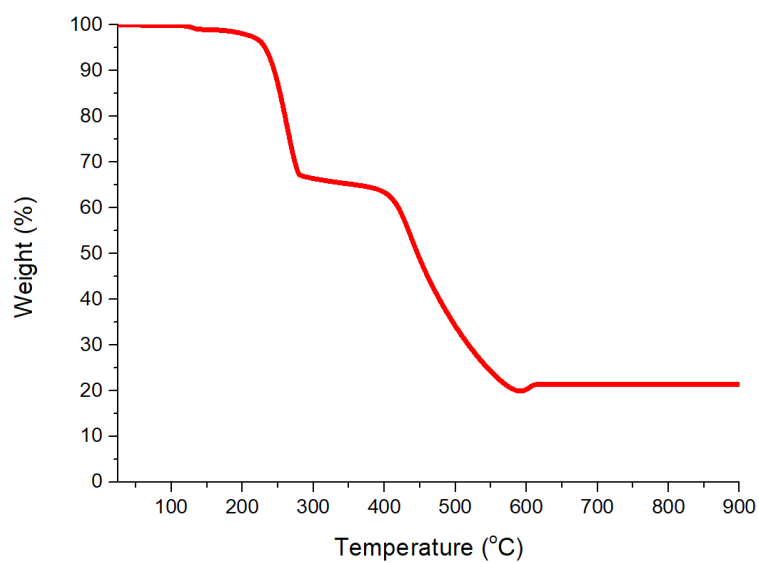

**Fig. S11** TGA trace of  $[\text{CuL}(\text{DMF})_2]_n$ .

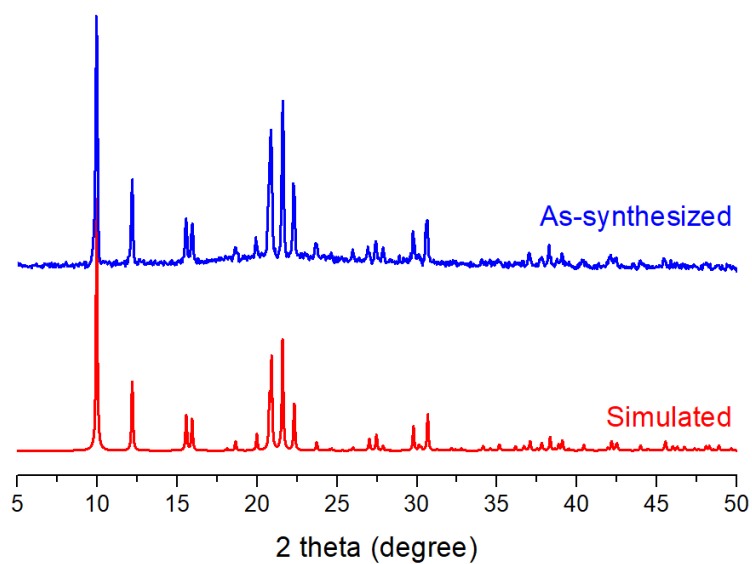

**Fig. S12** PXRD patterns of  $[\text{CuL}(\text{DMF})_2]_n$ .

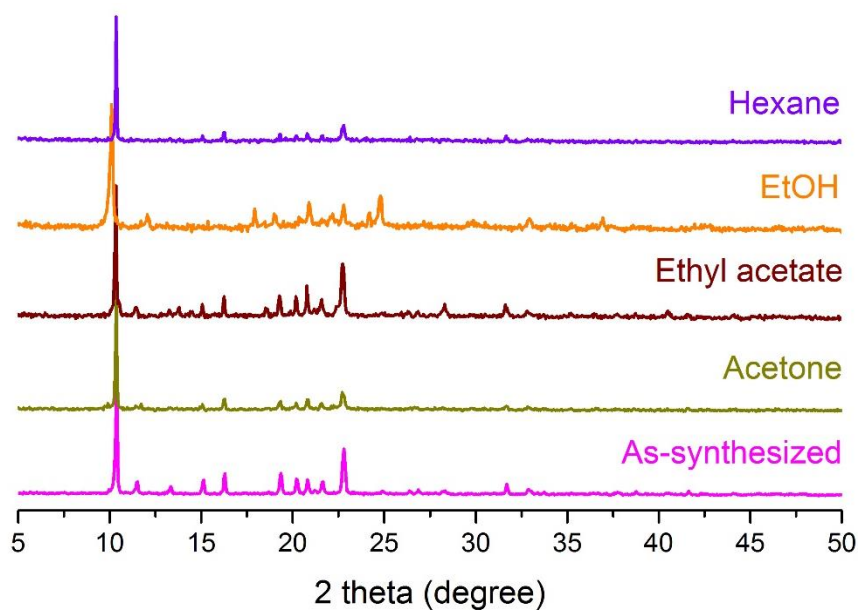

**Fig. S13** PXRD patterns of  $[\text{CuL}(\text{DMF})_2]_n$  soaked in different solvents.

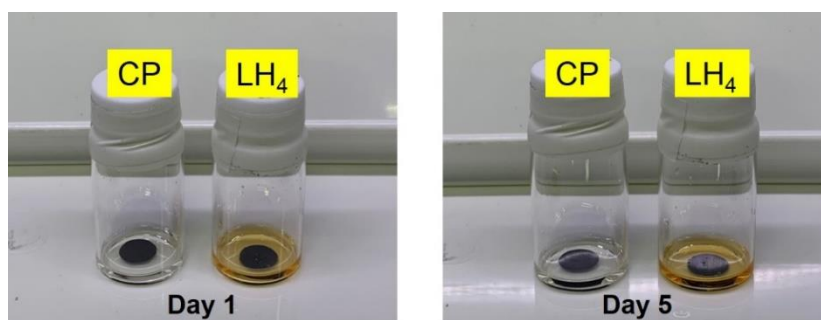

**Fig. S14** Dissolution test of CP and LH<sub>4</sub> in electrolyte solution after 1 d (left) and 5 d (right).

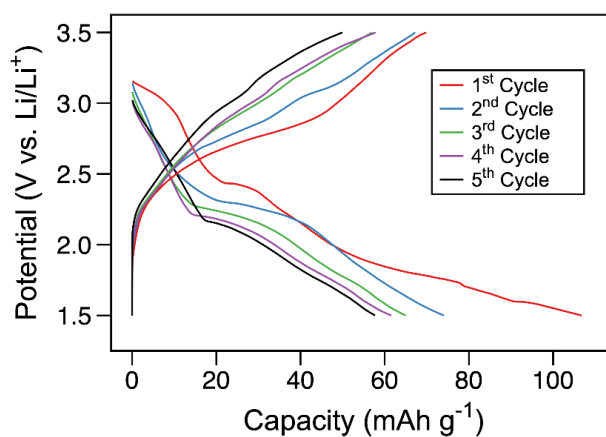

**Fig. S15** Discharge-charge profiles of LH<sub>4</sub> at  $10 \text{ mA g}^{-1}$  for the first 5 cycles using 1 M  $\text{LiPF}_6$  in EC/DMC (1:1) as electrolyte (LH<sub>4</sub> : Super P : KS4 : PVDF = 5:3:1:1).

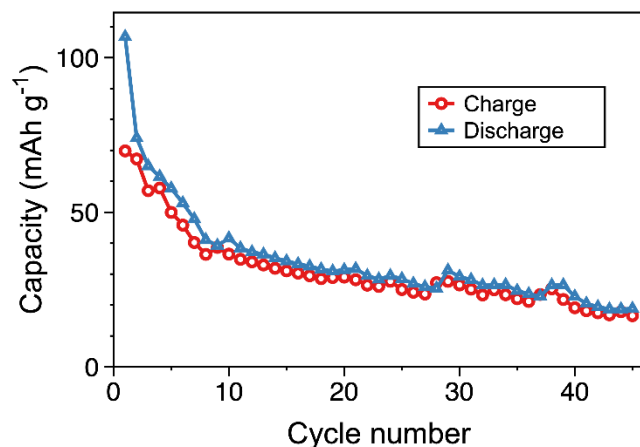

**Fig. S16** Capacity retention of LH<sub>4</sub> at 10 mA g<sup>-1</sup> (~C/14).

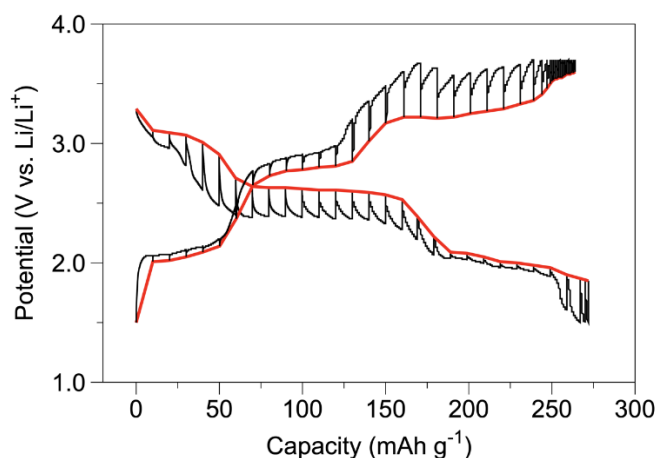

**Fig. S17** GITT discharge/charge curves of [CuL(DMF)<sub>2</sub>]<sub>n</sub>. GITT is used to determine quasi-equilibrium potentials at different stages during cell cycling. Red curve is constructed from the last data point of each relaxation period. It has been observed that there is an overpotential of up to 300 mV on discharge and a comparable polarization (~200 mV) on charge, which suggests a kinetic limitation of the electrochemical reactions of the CP.

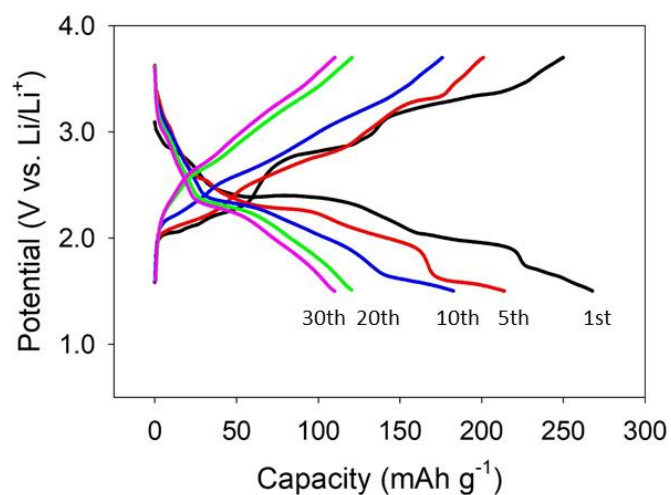

**Fig. S18** Discharge/charge profiles of  $[\text{CuL}(\text{DMF})_2]_n$  with a rate of  $80 \text{ mA g}^{-1}$  at different cycles.

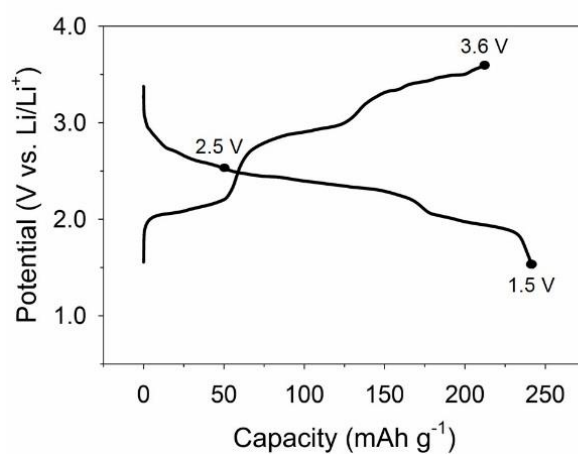

**Fig. S19** Discharge-charge profile of CP electrode, labeled with different voltage positions for FT-IR and PXRD experiments.

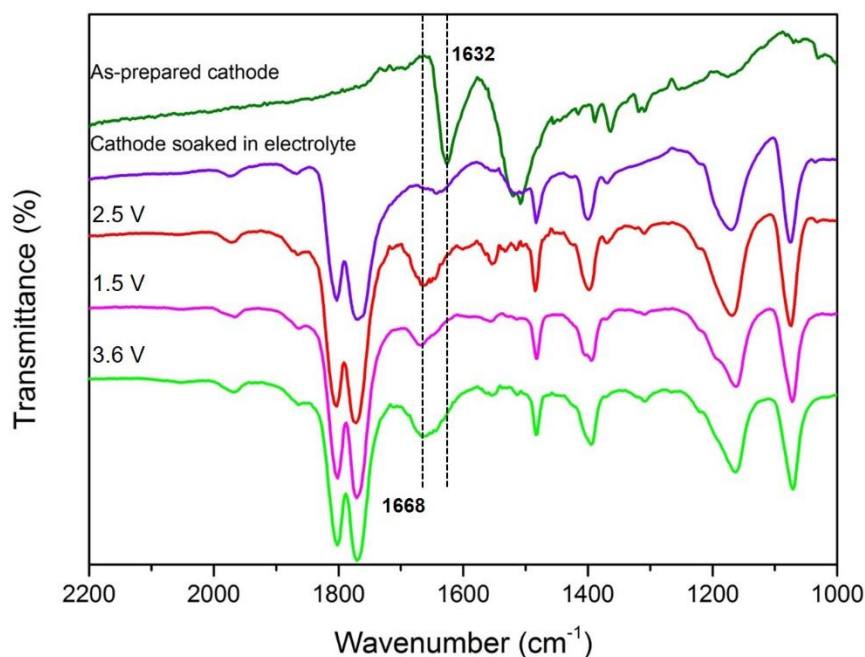

**Fig. S20** FT-IR spectra of CP electrodes at different voltage positions. The coordinating carbonyl groups were observed at  $1632\text{ cm}^{-1}$  (as-prepared cathode) and at  $1668\text{ cm}^{-1}$  (discharged and charged electrodes).<sup>1</sup> The relative intensity of the carbonyl group decreased on discharge down to 1.5 V, and increased on charge up to 3.6 V.

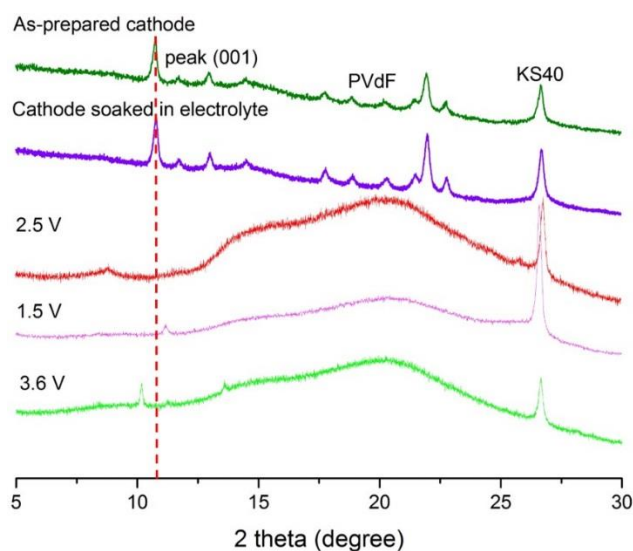

**Fig. S21** *Ex situ* PXRD patterns of CP electrodes. The (001) peak of CP active material was obviously shifted during discharge-charge cycle. This result suggested the structural flexibility of CP.

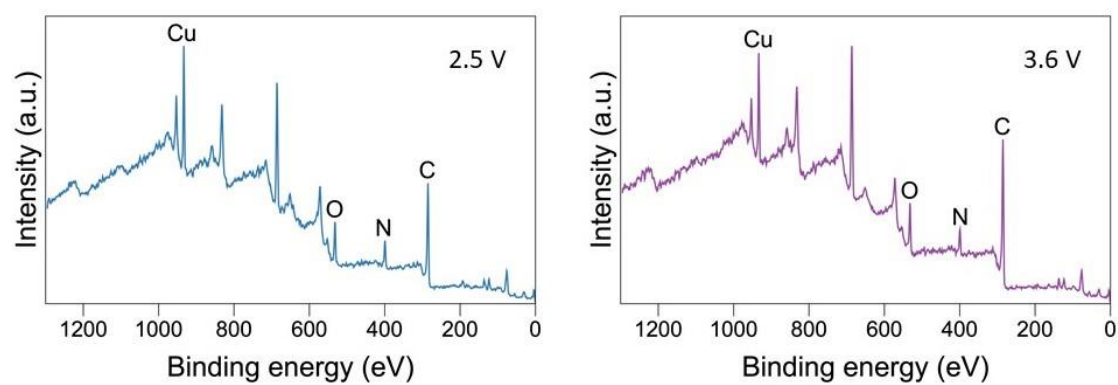

**Fig. S22** XPS low-resolution survey data of CP electrodes at 2.5 and 3.6 V.

## Extended X-ray absorption fine structure (EXAFS) analysis

EXAFS analysis of CP electrodes were carried out at Beamline TPS44A in National Synchrotron Radiation Research Center, Hsinchu, Taiwan. The Cu K-edge EXAFS spectra were collected in transmission mode, using nitrogen-filled gridded ionization chambers<sup>2</sup> with a quick-scanning monochromator at room temperature<sup>3</sup>. The parameters of the local structure around the copper atom were determined by curve-fitting procedures using Artemis<sup>4</sup> data analysis software.

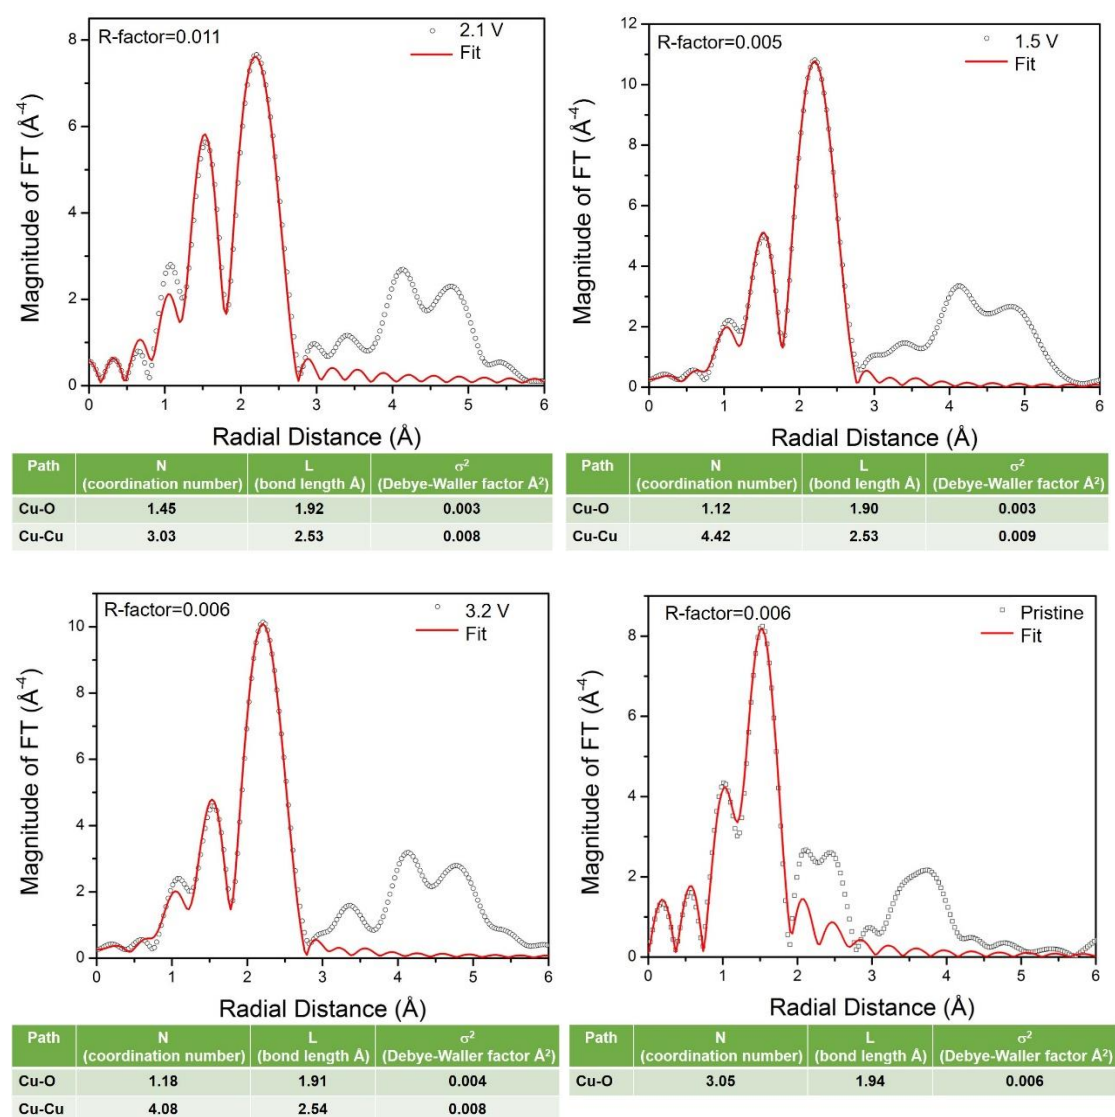

**Fig. S23** Cu K-edge EXAFS spectra of CP electrodes. The circle curves are the observed data and the solid lines are the best fit from the parameters in the corresponding tables.

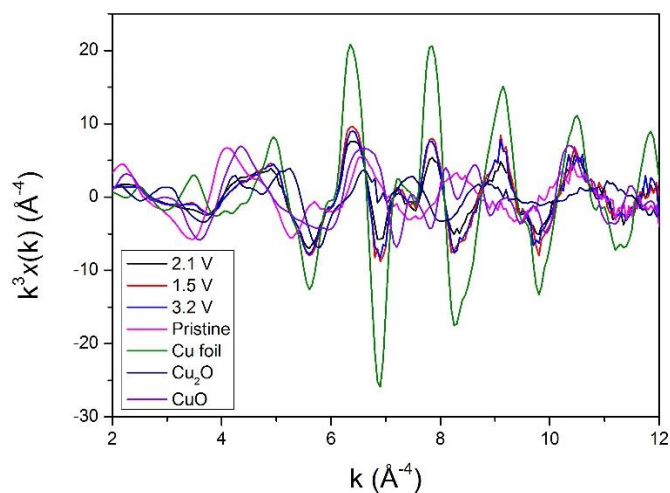

**Fig. S24** Fourier-transformed  $k^3\chi(k)$  vs.  $k$  EXAFS spectrum for CP electrodes.

**Table S1.** Crystallographic data for  $[\text{CuL}(\text{DMF})_2]_n$ .

|                                    |                                                    |
|------------------------------------|----------------------------------------------------|
| Identification code                | d20140                                             |
| Empirical formula                  | $\text{C}_{14}\text{H}_{14}\text{CuN}_4\text{O}_6$ |
| Formula weight                     | 397.83                                             |
| Temperature/K                      | 200(2)                                             |
| Crystal system                     | Triclinic                                          |
| Space group                        | $P\bar{1}$                                         |
| $a/\text{\AA}$                     | 6.000(2)                                           |
| $b/\text{\AA}$                     | 7.988(3)                                           |
| $c/\text{\AA}$                     | 8.967(4)                                           |
| $\alpha/^\circ$                    | 75.720(14)                                         |
| $\beta/^\circ$                     | 76.573(14)                                         |
| $\gamma/^\circ$                    | 88.048(12)                                         |
| Volume/ $\text{\AA}^3$             | 405.0(3)                                           |
| $Z$                                | 1                                                  |
| $\rho_{\text{calc}}/\text{g/cm}^3$ | 1.631                                              |
| $\mu/\text{mm}^{-1}$               | 1.388                                              |
| $F(000)$                           | 203                                                |
| Radiation                          | Mo $K\alpha$ ( $\lambda = 0.71073$ )               |



|                                                 |                                                               |
|-------------------------------------------------|---------------------------------------------------------------|
| $2\theta$ range for data collection/ $^{\circ}$ | 2.63 to 25.07                                                 |
| Index ranges                                    | $-7 \leq h \leq 7, -9 \leq k \leq 9, -10 \leq l \leq 10$      |
| Reflections collected                           | 8086                                                          |
| Independent reflections                         | 1416 [ $R_{\text{int}} = 0.0421, R_{\text{sigma}} = 0.0278$ ] |
| Data/restraints/parameters                      | 1416/0/117                                                    |
| Goodness-of-fit on $F^2$                        | 1.092                                                         |
| Final $R$ indexes [ $I > 2\sigma(I)$ ]          | $R_1 = 0.0237, wR_2 = 0.0595$                                 |
| Final $R$ indexes [all data]                    | $R_1 = 0.0255, wR_2 = 0.0605$                                 |
| Largest diff. peak/hole / e $\text{\AA}^{-3}$   | 0.27/-0.29                                                    |

**Table S2.** Comprehensive overview of coordination polymers applied as cathode materials in Li-ion batteries.

| Coordination polymer, dimension                                                                                                              | Electrode composition (active material/conducting additive/binder) | Conducting additive      | Binder | Theoretical capacity [mAh g <sup>-1</sup> ], 1 <sup>st</sup> cycle, % material activity | Number of cycles, capacity last cycle [mAh g <sup>-1</sup> ], % material activity, current density | Charge voltage [V] | Discharge voltage [V] | Electrolyte                                                           | Reference |
|----------------------------------------------------------------------------------------------------------------------------------------------|--------------------------------------------------------------------|--------------------------|--------|-----------------------------------------------------------------------------------------|----------------------------------------------------------------------------------------------------|--------------------|-----------------------|-----------------------------------------------------------------------|-----------|
| [CuL(DMF) <sub>2</sub> ] <sub>n</sub><br>1D                                                                                                  | 30/60/10                                                           | Super P/<br>graphite KS4 | PVDF   | 268, 268, 100                                                                           | 33, 120, 45, 80 mA g <sup>-1</sup>                                                                 | 2.2, 2.8,<br>3.4   | 2.8, 2.4,<br>1.9      | EC/DMC 1/1,<br>1M LiPF <sub>6</sub>                                   | This work |
| [FePcOC(tz)] <sub>n</sub><br>1D                                                                                                              | 65/20/15                                                           | AB                       | PVDF   | n.d., 1095, n.d.                                                                        | 100, 70, 6.4, 70 μA cm <sup>-2</sup>                                                               | –                  | 2.46                  | PC/DMC,<br>1M LiPF <sub>6</sub>                                       | 5         |
| [FePcOC(dib)] <sub>n</sub><br>1D                                                                                                             | 60/25/15                                                           | AB                       | PVDF   | n.d, 147, n.d.                                                                          | 60, 147, 100, 70 μA cm <sup>-2</sup>                                                               | –                  | 3.2                   | DME<br>1M LiPF <sub>6</sub>                                           | 6         |
| [Li <sub>2</sub> (C <sub>6</sub> H <sub>2</sub> O <sub>4</sub> )]<br>1D                                                                      | 60/35/5                                                            | AB                       | PTFE   | n.d., 176, n.d.                                                                         | 10, 137, 78%, 100 mA g <sup>-1</sup>                                                               | 2.3                | 2.1                   | EC/DMC 1/1,<br>1M LiPF <sub>6</sub>                                   | 7         |
| Li <sub>2</sub> PDHBQS<br>1D                                                                                                                 | 60/30/10                                                           | CC                       | PTFE   | 295, 285, 97%                                                                           | 1500, 239, 89%, 500 mA g <sup>-1</sup>                                                             | 2.0                | 2.0                   | DOL/DME 1/1,<br>1M LiN(CF <sub>3</sub> SO <sub>2</sub> ) <sub>2</sub> | 8         |
| CuTIB<br>2D                                                                                                                                  | 40/50/10                                                           | Super P                  | PVDF   | n.d., 155, n.d.                                                                         | 150, 50, 32%, 50 mA g <sup>-1</sup>                                                                | –                  | –                     | EC/DMC 1/1,<br>1M LiPF <sub>6</sub>                                   | 9         |
| {[Cd(ClO <sub>4</sub> ) <sub>2</sub> (DPNDI) <sub>2</sub> ]<br>·(DMA) <sub>4.5</sub> ·(H <sub>2</sub> O) <sub>2</sub> } <sub>n</sub> ,<br>2D | 45/45/10                                                           | Super P                  | PVDF   | n.d., 46.8, n.d.                                                                        | 50, 36.7, 78.4%, 100 mA g <sup>-1</sup>                                                            | –                  | 2.6–2.3               | EC/EMC/DMC<br>1/1/1, 1M LiPF <sub>6</sub>                             | 10        |
| Cu <sub>3</sub> (HHTP) <sub>2</sub><br>2D                                                                                                    | 80/0/20                                                            | None                     | PVDF   | 95.6, 95, 99%                                                                           | 20, 94.9, 99%, 1C                                                                                  | 2.55               | 2.55                  | EC/DMC 1/1<br>1M LiPF <sub>6</sub>                                    | 11        |

| Coordination<br>polymer, dimension                                             | Electrode composition<br>(active material/conducting<br>additive/binder) | Conducting<br>additive | Binder | Theoretical capacity<br>[mAh g <sup>-1</sup> ], 1 <sup>st</sup> cycle,<br>% material activity | Number of cycles, capacity last<br>cycle [mAh g <sup>-1</sup> ], % material<br>activity, current density | Charge<br>voltage<br>[V] | Discharge<br>voltage<br>[V] | Electrolyte                               | Reference |
|--------------------------------------------------------------------------------|--------------------------------------------------------------------------|------------------------|--------|-----------------------------------------------------------------------------------------------|----------------------------------------------------------------------------------------------------------|--------------------------|-----------------------------|-------------------------------------------|-----------|
| MIL-101(Fe)<br>3D                                                              | 33/33/33                                                                 | KB                     | PTFE   | n.d., 60, n.d.                                                                                | 100, 72, 1.2, 0.2 C                                                                                      | 2.6                      | 3.2                         | EC/DMC 1/2<br>1M LiPF <sub>6</sub>        | 12        |
| MIL-53(Fe)·H <sub>2</sub> O<br>3D                                              | 85/15/0                                                                  | Super P                | None   | n.d., 80, n.d.                                                                                | 50, 75, 94%, C/40                                                                                        | –                        | 2.9V                        | EC/DMC 1/1<br>1M LiPF <sub>6</sub>        | 13        |
| Cu(2,7-AQDC)<br>3D                                                             | 10/70/20                                                                 | CB                     | PVDF   | 162, 147, 91%                                                                                 | 50, 105, 65%, 1 mA g <sup>-1</sup>                                                                       | –                        | 3.2–2.4<br>2.4–1.7          | EC/DEC 1/1<br>1M LiPF <sub>6</sub>        | 14        |
| Mn <sub>7</sub> (2,7-AQDC) <sub>6</sub> (2,6-<br>AQDC) (DMA) <sub>6</sub> , 3D | 10/70/20                                                                 | CB                     | PVDF   | 190, 205, 108%                                                                                | 50, 177, 93%, 1 mA g <sup>-1</sup>                                                                       | –                        | 3.2                         | EC/DEC 1/1<br>1M LiPF <sub>6</sub>        | 15        |
| Cu-TCA<br>3D                                                                   | 80/10/10                                                                 | Super P                | PVDF   | 145, 102.2, 70%                                                                               | 200, 39.9, 39%, 0.5 C                                                                                    | 2.9–3.5<br>3.8–4.3       | 4.3–3.9<br>2–1.8            | EC/DMC 1/1<br>1M LiPF <sub>6</sub>        | 16        |
| {CoLi(BTC)(DMA) <sub>2</sub> } <sub>n</sub><br>3D                              | 60/30/10                                                                 | AB                     | PVDF   | n.d., 156, n.d.                                                                               | 50, 64, 41%, 50 mA g <sup>-1</sup>                                                                       | –                        | –                           | EC/DEC/EMC<br>1/1/1, 1M LiPF <sub>6</sub> | 17        |
| V <sup>IV</sup> (O)(bdc)<br>3D                                                 | 65/30/5                                                                  | AB                     | PVDF   | n.d., 118, n.d.                                                                               | 50, 82, 69%, 10 mA g <sup>-1</sup>                                                                       | –                        | 2.7                         | EC/DMC 1/1<br>1M LiPF <sub>6</sub>        | 18        |
| CuFe-PBA@NiFe-<br>PBA, 3D                                                      | 70/15/15                                                                 | AB                     | PTFE   | n.d., 99, n.d.                                                                                | 50, 64, 65%, 10 mA g <sup>-1</sup>                                                                       | –                        | 3.24, 2.95                  | EC/DEC 1/1<br>1M LiPF <sub>6</sub>        | 19        |
| K <sub>2</sub> Mn[Mn(CN) <sub>6</sub> ]<br>3D                                  | 75/20/5                                                                  | AB                     | PTFE   | 176, 197, 112%                                                                                | 10, 140, 71%, 30 mA g <sup>-1</sup>                                                                      | 3.7, 3.0                 | 3.7, 3.0                    | EC/DEC 1/1<br>1M LiPF <sub>6</sub>        | 20        |
| FeHCCo<br>3D                                                                   | 70/20/10                                                                 | Super P                | PVDF   | n.d., 136, n.d.                                                                               | 40, 150, 110%, 0.63 C                                                                                    | –                        | –                           | EC/DEC 1/1<br>1M LiPF <sub>6</sub>        | 21        |

n.d.; not determined, PVDF: poly(vinylidene fluoride), EC: ethylene carbonate, DMC: dimethyl carbonate, PcOC: octacyanophthalocyanine, tz: tetrazine, AB: acetylene black, PC: propylene carbonate, dib: diisocyanobenzene, DME: dimethoxyethane, PTFE: polytetrafluoroethylene, PDHBQS: 2,5-dihydroxy-*p*-benzoquinonyl sulfide, CC: conductive carbon, DOL: 1,3-dioxolane, TIB: 1,2,4,5-tetraaminobenzene, DPNDI: *N,N'*-di(4-pyridyl)-1,4,5,8-naphthalenediimide, EMC: ethylene methyl carbonate, DMA: N,N-dimethylacetamide, HHTP: 2,3,6,7,10,11-hexahydroxytriphenylene, KB; Ketjen black, 2,7-AQDC: 2,7-anthraquinonedicarboxylate, 2,6-AQDC: 2,6-anthraquinonedicarboxylate, TCA: tricarboxytriphenyl amine, BTC: 1,3,5-benzenetricarboxylate, bdc: 1,4-benzenedicarboxylate, PBA: prussian blue analogues, HCCo: hexacyanocobaltate.

## References

1. B. Cheng, H. Yi, C. He, C. Liu and A. Lei, *Organometallics*, 2015, **34**, 206–211.
2. O. Müller, J. Stötzl, D. Lützenkirchen-Hecht and R. Frahm, *J. Phys. Conf. Ser.* 2013, **425**, 092010.
3. O. Müller, D. Lützenkirchen-Hecht and R. Frahm, *Rev. Sci. Instrum.* 2015, **86**, 093905.
4. B. Ravel and M. Newville, *J. Synchrotron. Rad.* 2005, **12**, 537–541.
5. S.-J. Kim, K. Onishi, M. Matsumoto and K. Shigehara, *J. Porphyrins Phthalocyanines*, 2001, **5**, 397–404.
6. Y. Asai, K. Onishi, S. Miyata, S.-J. Kim, M. Matsumoto and K. Shigehara, *J. Electrochem. Soc.*, 2001, **148**, A305–A310.
7. J. Xiang, C. Chang, M. Li, S. Wu, L. Yuan and J. Sun, *Cryst. Growth Des.*, 2008, **8**, 280–282.
8. Z. Song, Y. Qian, X. Liu, T. Zhang, Y. Zhu, H. Yu, M. Otani and H. Zhou, *Energy Environ. Sci.*, 2014, **7**, 4077–4086.
9. R. R. Kapaev, S. Olthof, I. S. Zhidkov, E. Z. Kurmaev, K. J. Stevenson, K. Meerholz and P. A. Troshin, *Chem. Mater.*, 2019, doi: 10.1021/acs.chemmater.9b01366.
10. B. Tian, G.-H. Ning, Q. Gao, L.-M. Tan, W. Tang, Z. Chen, C. Su and K. P. Loh, *ACS Appl. Mater. Interfaces*, 2016, **8**, 31067–31075.
11. S. Gu, Z. Bai, S. Majumder, B. Huang, G. Chen, *J. Power Sources*, 2019, **429**, 22–29.
12. T. Yamada, K. Shiraishi, H. Kitagawa and N. Kimizuka, *Chem. Commun.*, 2017, **53**, 8215–8218.
13. G. Férey, F. Millange, M. Morcrette, C. Serre, M.-L. Doublet, J.-M. Grenèche and J.-M. Tarascon, *Angew. Chem. Int. Ed.*, 2007, **46**, 3259–3263.
14. Z. Zhang, H. Yoshikawa and K. Awaga, *J. Am. Chem. Soc.*, 2014, **136**, 16112–16115.
15. Z. Zhang, H. Yoshikawa and K. Awaga, *Chem. Mater.*, 2016, **28**, 1298–1303.
16. Z. Peng, X. Yi, Z. Liu, J. Shang and D. Wang, *ACS Appl. Mater. Interfaces*, 2016, **8**, 14578–14585.
17. Z.-Q. Du, Y.-P. Li, X.-X. Wang, J. Wang and Q.-G. Zhai, *Dalton Trans.*, 2019, **48**, 2013–2018.
18. W. Kaveevivitchai and A. J. Jacobson, *J. Power Sources*, 2015, **278**, 265–273.
19. D. Asakura, C. H. Li, Y. Mizuno, M. Okubo, H. Zhou and D. R. Talham, *J. Am.*

- Chem. Soc.*, 2013, **135**, 2793–2799.
20. D. Asakura, M. Okubo, Y. Mizuno, T. Kudo, H. Zhou, K. Ikeda, T. Mizokawa, A. Okazawa and N. Kojima, *J. Phys. Chem. C*, 2012, **116**, 8364–8369.
21. K. Zhang, R. S. Varma, H. W. Jang, J.-W. Choi and M. Shokouhimehr, *J. Alloys Compd*, 2012, **791**, 911–917.
